# Supplementary material for: Structure and Properties of Cubic PuH2 and PuH3: A Density Functional Theory Study
Source: MDPI journal article supplement (doi:10.3390/cryst12101499), 2022-10-21
Supplement: s1 [file s1]

# Structure and Properties of Cubic PuH<sub>2</sub> and PuH<sub>3</sub>: A Density Functional Theory Study

Thomas Smith,<sup>1</sup> Samuel Moxon,<sup>1</sup> David J. Cooke,<sup>1</sup> Lisa J. Gillie,<sup>1</sup> Robert M. Harker,<sup>2</sup> Mark T. Storr,<sup>2</sup> E. Lora da Silva,<sup>3</sup> and Marco Molinari\*,<sup>1</sup>

<sup>1</sup> Department of Chemical Sciences, University of Huddersfield, Queensgate, Huddersfield, HD1 3DH, UK

<sup>2</sup> AWE Aldermaston, Reading, RG7 4PR, UK

<sup>3</sup> IFIMUP, Department of Physics and Astronomy, Faculty of Science, University of Porto, Rua do Campo Alegre, 687, 4169-007 Porto, Portugal

\* Corresponding author: m.molinari@hud.ac.uk

## Supporting Information

### Table of contents

|                                                                                                                                      |   |
|--------------------------------------------------------------------------------------------------------------------------------------|---|
| Section S1: Convergence testing of cubic PuH <sub>2</sub> and PuH <sub>3</sub> using PBEsol+U+SOC.....                               | 1 |
| Section S2: Energetics and structural properties of cubic PuH <sub>2</sub> and PuH <sub>3</sub> calculated with PBEsol+U+SOC+D3..... | 2 |
| Section S3: Magnetic, structural and electronic properties of cubic PuH <sub>2</sub> and PuH <sub>3</sub> .....                      | 8 |

### Section S1: Convergence testing of cubic PuH<sub>2</sub> and PuH<sub>3</sub> using PBEsol+U+SOC

**Table S1.** *k*-point and cut off convergence testing for cubic PuH<sub>2</sub> and PuH<sub>3</sub> using PBEsol+U+SOC.

| <i>k</i> -point Convergence Testing                  |                          |                          |                          |                          |                          |                          |
|------------------------------------------------------|--------------------------|--------------------------|--------------------------|--------------------------|--------------------------|--------------------------|
| Differences in Energy per PuH <sub>2</sub> unit (eV) |                          |                          |                          |                          |                          |                          |
| Magnetic Configuration                               | (7×7×7) - (5×5×5)        | (9×9×9) - (7×7×7)        | (11×11×11) - (9×9×9)     | (13×13×13) - (11×11×11)  | (15×15×15) - (13×13×13)  |                          |
| FM <111>                                             | -9.45 × 10 <sup>-4</sup> | 6.82 × 10 <sup>-4</sup>  | 1.28 × 10 <sup>-4</sup>  | 9.70 × 10 <sup>-4</sup>  | -1.37 × 10 <sup>-4</sup> |                          |
| L3KAFM                                               | 1.00 × 10 <sup>-3</sup>  | -2.65 × 10 <sup>-4</sup> | 1.02 × 10 <sup>-4</sup>  | 2.65 × 10 <sup>-4</sup>  | -1.18 × 10 <sup>-4</sup> |                          |
| T3KAFM                                               | 9.20 × 10 <sup>-4</sup>  | -2.85 × 10 <sup>-4</sup> | 9.5 × 10 <sup>-5</sup>   | 2.68 × 10 <sup>-4</sup>  | -1.18 × 10 <sup>-4</sup> |                          |
| Differences in Energy per PuH <sub>3</sub> unit (eV) |                          |                          |                          |                          |                          |                          |
| FM <111>                                             | -1.42 × 10 <sup>-3</sup> | 5.45 × 10 <sup>-4</sup>  | -1.92 × 10 <sup>-4</sup> | 2.70 × 10 <sup>-5</sup>  | 1.84 × 10 <sup>-3</sup>  |                          |
| L3KAFM                                               | -8.10 × 10 <sup>-4</sup> | 1.05 × 10 <sup>-4</sup>  | 7.00 × 10 <sup>-6</sup>  | -5.50 × 10 <sup>-5</sup> | 2.17 × 10 <sup>-4</sup>  |                          |
| T3KAFM                                               | -9.12 × 10 <sup>-4</sup> | 1.15 × 10 <sup>-4</sup>  | 8.00 × 10 <sup>-6</sup>  | -5.30 × 10 <sup>-5</sup> | 2.15 × 10 <sup>-4</sup>  |                          |
| Cut off Convergence Testing                          |                          |                          |                          |                          |                          |                          |
| Differences in Energy per PuH <sub>2</sub> unit (eV) |                          |                          |                          |                          |                          |                          |
|                                                      | 500 – 400 (eV)           | 600 – 500 (eV)           | 700 – 600 (eV)           | 800 – 700 (eV)           | 900 – 800 (eV)           | 1000 – 900 (eV)          |
| FM <111>                                             | -7.69 × 10 <sup>-3</sup> | -2.15 × 10 <sup>-3</sup> | -3.48 × 10 <sup>-4</sup> | -1.01 × 10 <sup>-3</sup> | -1.60 × 10 <sup>-4</sup> | -6.30 × 10 <sup>-5</sup> |
| L3KAFM                                               | -7.67 × 10 <sup>-3</sup> | -2.12 × 10 <sup>-3</sup> | -7.57 × 10 <sup>-4</sup> | -5.92 × 10 <sup>-4</sup> | -1.63 × 10 <sup>-4</sup> | -5.70 × 10 <sup>-5</sup> |
| T3KAFM                                               | -7.66 × 10 <sup>-3</sup> | -2.11 × 10 <sup>-3</sup> | -7.60 × 10 <sup>-4</sup> | -5.92 × 10 <sup>-4</sup> | -1.60 × 10 <sup>-4</sup> | -6.00 × 10 <sup>-5</sup> |
| Differences in Energy per PuH <sub>3</sub> unit (eV) |                          |                          |                          |                          |                          |                          |
| FM <111>                                             | -8.06 × 10 <sup>-3</sup> | -2.69 × 10 <sup>-3</sup> | -8.70 × 10 <sup>-4</sup> | -6.37 × 10 <sup>-4</sup> | -1.75 × 10 <sup>-4</sup> | -7.70 × 10 <sup>-5</sup> |
| L3KAFM                                               | -8.03 × 10 <sup>-3</sup> | -2.68 × 10 <sup>-3</sup> | -8.72 × 10 <sup>-4</sup> | -6.30 × 10 <sup>-4</sup> | -1.77 × 10 <sup>-4</sup> | -7.02 × 10 <sup>-5</sup> |
| T3KAFM                                               | -8.00 × 10 <sup>-3</sup> | -2.68 × 10 <sup>-3</sup> | -8.72 × 10 <sup>-4</sup> | -6.33 × 10 <sup>-4</sup> | -1.75 × 10 <sup>-4</sup> | -7.30 × 10 <sup>-5</sup> |

## Section S2: Energetics and structural properties of cubic PuH<sub>2</sub> and PuH<sub>3</sub> calculated with PBEsol+U+SOC+D3

**Table S2.** Relative energies per formula unit, calculated when considering van der Waal's dispersion corrections (D3) of Grimme *et al.* [1], *i.e.* PBEsol+U+SOC+D3 ( $U = 0 - 7$  eV), for cubic PuH<sub>2</sub> and PuH<sub>3</sub> with: FM <100>, <110> and <111>; longitudinal AFM 1k, 2k and 3k; and transverse AFM 1k, 2k and 3k magnetic orders.

| Magnetic Order | PuH <sub>x</sub> | PBEsol+U+SOC+D3 - $U$ (eV) |       |       |       |       |       |       |       |
|----------------|------------------|----------------------------|-------|-------|-------|-------|-------|-------|-------|
|                |                  | 0                          | 1     | 2     | 3     | 4     | 5     | 6     | 7     |
| FM <100>       | PuH <sub>2</sub> | 0.065                      | 0.044 | 0.047 | 0.048 | 0.050 | 0.053 | 0.057 | 0.062 |
|                | PuH <sub>3</sub> | 0.000                      | 0.010 | 0.014 | 0.022 | 0.028 | 0.033 | 0.039 | 0.048 |
| FM <110>       | PuH <sub>2</sub> | 0.054                      | 0.042 | 0.019 | 0.009 | 0.004 | 0.001 | 0.000 | 0.000 |
|                | PuH <sub>3</sub> | 0.003                      | 0.000 | 0.063 | 0.048 | 0.039 | 0.031 | 0.025 | 0.020 |
| FM <111>       | PuH <sub>2</sub> | 0.051                      | 0.050 | 0.028 | 0.020 | 0.017 | 0.016 | 0.018 | 0.020 |
|                | PuH <sub>3</sub> | 0.002                      | 0.005 | 0.000 | 0.000 | 0.000 | 0.000 | 0.087 | 0.090 |
| L1kAFM         | PuH <sub>2</sub> | 0.031                      | 0.030 | 0.029 | 0.034 | 0.039 | 0.045 | 0.052 | 0.059 |
|                | PuH <sub>3</sub> | 0.053                      | 0.039 | 0.046 | 0.045 | 0.045 | 0.046 | 0.049 | 0.054 |
| L2kAFM         | PuH <sub>2</sub> | 0.030                      | 0.023 | 0.007 | 0.003 | 0.001 | 0.001 | 0.002 | 0.003 |
|                | PuH <sub>3</sub> | 0.074                      | 0.061 | 0.041 | 0.025 | 0.015 | 0.070 | 0.056 | 0.044 |
| L3kAFM         | PuH <sub>2</sub> | 0.029                      | 0.029 | 0.018 | 0.016 | 0.016 | 0.017 | 0.088 | 0.070 |
|                | PuH <sub>3</sub> | 0.083                      | 0.098 | 0.067 | 0.046 | 0.035 | 0.028 | 0.025 | 0.026 |
| T1kAFM         | PuH <sub>2</sub> | 0.005                      | 0.004 | 0.023 | 0.034 | 0.042 | 0.048 | 0.055 | 0.062 |
|                | PuH <sub>3</sub> | 0.052                      | 0.061 | 0.054 | 0.049 | 0.044 | 0.036 | 0.031 | 0.029 |
| T2kAFM         | PuH <sub>2</sub> | 0.000                      | 0.000 | 0.000 | 0.000 | 0.000 | 0.000 | 0.001 | 0.003 |
|                | PuH <sub>3</sub> | 0.052                      | 0.063 | 0.037 | 0.020 | 0.011 | 0.004 | 0.000 | 0.000 |
| T3kAFM         | PuH <sub>2</sub> | 0.000                      | 0.008 | 0.008 | 0.009 | 0.011 | 0.013 | 0.017 | 0.094 |
|                | PuH <sub>3</sub> | 0.076                      | 0.075 | 0.051 | 0.034 | 0.026 | 0.020 | 0.018 | 0.020 |

**Table S3.** Spin, orbital and total magnetic moment, calculated when considering van der Waal's dispersion corrections (D3) of Grimme *et al.* [1], i.e. PBEsol+U+SOC+D3 ( $U = 0 - 7$  eV), for cubic PuH<sub>2</sub> and PuH<sub>3</sub> with: FM <100>, <110> and <111>; longitudinal AFM 1k, 2k and 3k; and transverse AFM 1k, 2k and 3k magnetic orders.

|                                                |                  | PBEsol+U+SOC+D3 - U (eV) |      |      |      |      |      |      |      |
|------------------------------------------------|------------------|--------------------------|------|------|------|------|------|------|------|
| Magnetic Order                                 | PuH <sub>x</sub> | 0                        | 1    | 2    | 3    | 4    | 5    | 6    | 7    |
| μ <sub>spin</sub> (μ <sub>B</sub> / Pu ion)    |                  |                          |      |      |      |      |      |      |      |
| FM <100>                                       | PuH <sub>2</sub> | 4.56                     | 4.67 | 4.66 | 4.70 | 4.75 | 4.79 | 4.83 | 4.87 |
|                                                | PuH <sub>3</sub> | 4.56                     | 4.60 | 4.62 | 4.65 | 4.68 | 4.72 | 4.76 | 4.80 |
| FM <110>                                       | PuH <sub>2</sub> | 4.55                     | 4.66 | 4.66 | 4.70 | 4.74 | 4.78 | 4.82 | 4.86 |
|                                                | PuH <sub>3</sub> | 4.57                     | 4.60 | 4.64 | 4.68 | 4.72 | 4.76 | 4.80 | 4.84 |
| FM <111>                                       | PuH <sub>2</sub> | 4.54                     | 4.69 | 4.70 | 4.74 | 4.78 | 4.82 | 4.86 | 4.90 |
|                                                | PuH <sub>3</sub> | 4.57                     | 4.63 | 4.66 | 4.70 | 4.73 | 4.76 | 4.76 | 4.80 |
| L1kAFM                                         | PuH <sub>2</sub> | 4.47                     | 4.58 | 4.64 | 4.69 | 4.73 | 4.78 | 4.82 | 4.86 |
|                                                | PuH <sub>3</sub> | 4.48                     | 4.57 | 4.61 | 4.64 | 4.68 | 4.73 | 4.77 | 4.81 |
| L2kAFM                                         | PuH <sub>2</sub> | 4.45                     | 4.55 | 4.62 | 4.67 | 4.72 | 4.76 | 4.80 | 4.84 |
|                                                | PuH <sub>3</sub> | 4.44                     | 4.52 | 4.57 | 4.61 | 4.66 | 4.73 | 4.79 | 4.84 |
| L3kAFM                                         | PuH <sub>2</sub> | 4.44                     | 4.57 | 4.65 | 4.71 | 4.76 | 4.80 | 4.77 | 4.82 |
|                                                | PuH <sub>3</sub> | 4.44                     | 4.57 | 4.62 | 4.67 | 4.71 | 4.76 | 4.80 | 4.85 |
| T1kAFM                                         | PuH <sub>2</sub> | 4.42                     | 4.54 | 4.62 | 4.68 | 4.73 | 4.77 | 4.81 | 4.85 |
|                                                | PuH <sub>3</sub> | 4.46                     | 4.55 | 4.59 | 4.63 | 4.68 | 4.73 | 4.78 | 4.83 |
| T2kAFM                                         | PuH <sub>2</sub> | 4.42                     | 4.56 | 4.62 | 4.68 | 4.72 | 4.76 | 4.80 | 4.84 |
|                                                | PuH <sub>3</sub> | 4.46                     | 4.52 | 4.56 | 4.62 | 4.67 | 4.71 | 4.75 | 4.80 |
| T3kAFM                                         | PuH <sub>2</sub> | 4.42                     | 4.58 | 4.66 | 4.72 | 4.76 | 4.81 | 4.85 | 4.82 |
|                                                | PuH <sub>3</sub> | 4.47                     | 4.56 | 4.61 | 4.67 | 4.71 | 4.76 | 4.80 | 4.85 |
| μ <sub>orbital</sub> (μ <sub>B</sub> / Pu ion) |                  |                          |      |      |      |      |      |      |      |
| FM <100>                                       | PuH <sub>2</sub> | 2.50                     | 2.94 | 3.24 | 3.35 | 3.44 | 3.53 | 3.61 | 3.70 |
|                                                | PuH <sub>3</sub> | 2.38                     | 2.78 | 2.99 | 3.13 | 3.26 | 3.37 | 3.48 | 3.59 |
| FM <110>                                       | PuH <sub>2</sub> | 2.55                     | 2.91 | 3.22 | 3.36 | 3.48 | 3.58 | 3.67 | 3.75 |
|                                                | PuH <sub>3</sub> | 2.42                     | 2.74 | 3.33 | 3.49 | 3.60 | 3.69 | 3.76 | 3.82 |
| FM <111>                                       | PuH <sub>2</sub> | 2.51                     | 2.95 | 3.25 | 3.38 | 3.47 | 3.56 | 3.64 | 3.71 |
|                                                | PuH <sub>3</sub> | 2.43                     | 2.82 | 3.04 | 3.21 | 3.35 | 3.46 | 4.34 | 4.44 |
| L1kAFM                                         | PuH <sub>2</sub> | 2.37                     | 2.94 | 3.18 | 3.30 | 3.40 | 3.49 | 3.58 | 3.67 |
|                                                | PuH <sub>3</sub> | 2.24                     | 2.65 | 2.89 | 3.04 | 3.17 | 3.28 | 3.40 | 3.52 |
| L2kAFM                                         | PuH <sub>2</sub> | 2.32                     | 2.89 | 3.14 | 3.29 | 3.41 | 3.52 | 3.62 | 3.71 |
|                                                | PuH <sub>3</sub> | 2.22                     | 2.68 | 2.94 | 3.13 | 3.28 | 3.64 | 3.71 | 3.78 |
| L3kAFM                                         | PuH <sub>2</sub> | 2.33                     | 2.94 | 3.16 | 3.30 | 3.40 | 3.50 | 2.70 | 3.72 |
|                                                | PuH <sub>3</sub> | 2.21                     | 2.74 | 2.98 | 3.14 | 3.26 | 3.38 | 3.48 | 3.58 |
| T1kAFM                                         | PuH <sub>2</sub> | 2.38                     | 2.87 | 3.13 | 3.26 | 3.37 | 3.46 | 3.56 | 3.66 |
|                                                | PuH <sub>3</sub> | 2.15                     | 2.66 | 2.90 | 3.09 | 3.26 | 3.39 | 3.49 | 3.58 |
| T2kAFM                                         | PuH <sub>2</sub> | 2.44                     | 2.83 | 3.10 | 3.27 | 3.40 | 3.51 | 3.61 | 3.71 |
|                                                | PuH <sub>3</sub> | 2.15                     | 2.73 | 2.98 | 3.15 | 3.29 | 3.42 | 3.54 | 3.65 |
| T3kAFM                                         | PuH <sub>2</sub> | 2.41                     | 2.88 | 3.15 | 3.30 | 3.41 | 3.51 | 3.59 | 2.75 |
|                                                | PuH <sub>3</sub> | 2.27                     | 2.83 | 3.05 | 3.20 | 3.32 | 3.43 | 3.52 | 3.62 |
| μ <sub>total</sub> (μ <sub>B</sub> / Pu ion)   |                  |                          |      |      |      |      |      |      |      |
| FM <100>                                       | PuH <sub>2</sub> | 2.07                     | 1.73 | 1.42 | 1.36 | 1.31 | 1.26 | 1.22 | 1.17 |
|                                                | PuH <sub>3</sub> | 2.18                     | 1.82 | 1.63 | 1.52 | 1.43 | 1.35 | 1.28 | 1.21 |
| FM <110>                                       | PuH <sub>2</sub> | 2.00                     | 1.75 | 1.44 | 1.34 | 1.26 | 1.20 | 1.15 | 1.11 |
|                                                | PuH <sub>3</sub> | 2.15                     | 1.86 | 1.31 | 1.19 | 1.12 | 1.07 | 1.04 | 1.03 |
| FM <111>                                       | PuH <sub>2</sub> | 2.02                     | 1.74 | 1.44 | 1.36 | 1.30 | 1.26 | 1.23 | 1.19 |
|                                                | PuH <sub>3</sub> | 2.15                     | 1.81 | 1.62 | 1.48 | 1.38 | 1.30 | 0.42 | 0.35 |
| L1kAFM                                         | PuH <sub>2</sub> | 2.10                     | 1.63 | 1.46 | 1.39 | 1.34 | 1.29 | 1.24 | 1.18 |
|                                                | PuH <sub>3</sub> | 2.24                     | 1.92 | 1.72 | 1.61 | 1.52 | 1.44 | 1.37 | 1.29 |
| L2kAFM                                         | PuH <sub>2</sub> | 2.13                     | 1.66 | 1.48 | 1.38 | 1.31 | 1.24 | 1.18 | 1.13 |
|                                                | PuH <sub>3</sub> | 2.22                     | 1.84 | 1.63 | 1.48 | 1.39 | 1.09 | 1.08 | 1.06 |
| L3kAFM                                         | PuH <sub>2</sub> | 2.11                     | 1.63 | 1.49 | 1.41 | 1.36 | 1.31 | 2.08 | 1.09 |
|                                                | PuH <sub>3</sub> | 2.22                     | 1.83 | 1.64 | 1.52 | 1.45 | 1.38 | 1.32 | 1.27 |
| T1kAFM                                         | PuH <sub>2</sub> | 2.03                     | 1.67 | 1.49 | 1.42 | 1.36 | 1.31 | 1.25 | 1.20 |
|                                                | PuH <sub>3</sub> | 2.31                     | 1.89 | 1.68 | 1.55 | 1.42 | 1.34 | 1.29 | 1.25 |
| T2kAFM                                         | PuH <sub>2</sub> | 1.98                     | 1.73 | 1.52 | 1.40 | 1.32 | 1.25 | 1.19 | 1.13 |
|                                                | PuH <sub>3</sub> | 2.31                     | 1.79 | 1.58 | 1.47 | 1.38 | 1.29 | 1.22 | 1.15 |
| T3kAFM                                         | PuH <sub>2</sub> | 2.01                     | 1.71 | 1.52 | 1.42 | 1.35 | 1.30 | 1.25 | 2.07 |
|                                                | PuH <sub>3</sub> | 2.19                     | 1.72 | 1.56 | 1.46 | 1.39 | 1.33 | 1.28 | 1.23 |

**Table S4.** Structural symmetries, obtaining from the calculations when considering van der Waal's dispersion corrections (D3) of Grimme *et al.* [1], *i.e.* PBEsol+*U*+SOC+D3 (*U* = 0 - 7 eV) with a tolerance of 10<sup>-5</sup> Å, for cubic PuH<sub>2</sub> and PuH<sub>3</sub> with: FM <100>, <110> and <111>; longitudinal AFM 1k, 2k and 3k; and transverse AFM 1k, 2k and 3k orders. For PuH<sub>3</sub>, the space groups are the same as PuH<sub>2</sub> apart from the labels in brackets, which refers to the space group for PuH<sub>3</sub> when it differs from that of PuH<sub>2</sub>. Space group numbers are attributed to the respective structural symmetries as: *I4/mmm* (139), *P1* (2), *C2/m* (12), *Immm* (71), *R3m* (166), *Fm3m* (225), *Fmmm* (69), *Cmca* (64), *Pbca* (61) and *Pa3* (205).

| Magnetic order | PBEsol+ <i>U</i> +SOC+D3 – <i>U</i> (eV) |               |               |               |               |               |               |               |
|----------------|------------------------------------------|---------------|---------------|---------------|---------------|---------------|---------------|---------------|
|                | 0                                        | 1             | 2             | 3             | 4             | 5             | 6             | 7             |
| FM <100>       | <i>I4/mmm</i>                            | <i>I4/mmm</i> | <i>I4/mmm</i> | <i>I4/mmm</i> | <i>I4/mmm</i> | <i>I4/mmm</i> | <i>I4/mmm</i> | <i>I4/mmm</i> |
| FM <110>       | <i>C2/m</i>                              | <i>C2/m</i>   | <i>C2/m</i>   | <i>C2/m</i>   | <i>C2/m</i>   | <i>C2/m</i>   | <i>C2/m</i>   | <i>C2/m</i>   |
| FM <111>       | <i>R3m</i>                               | <i>R3m</i>    | <i>R3m</i>    | <i>R3m</i>    | <i>R3m</i>    | <i>R3m</i>    | <i>R3m</i>    | <i>R3m</i>    |
| L1kAFM         | <i>I4/mmm</i>                            | <i>I4/mmm</i> | <i>I4/mmm</i> | <i>I4/mmm</i> | <i>I4/mmm</i> | <i>I4/mmm</i> | <i>I4/mmm</i> | <i>I4/mmm</i> |
| L2kAFM         | <i>I4/mmm</i>                            | <i>I4/mmm</i> | <i>I4/mmm</i> | <i>I4/mmm</i> | <i>I4/mmm</i> | <i>I4/mmm</i> | <i>I4/mmm</i> | <i>I4/mmm</i> |
| L3kAFM         | <i>Fm3m</i>                              | <i>Fm3m</i>   | <i>Fm3m</i>   | <i>Fm3m</i>   | <i>Fm3m</i>   | <i>Fm3m</i>   | <i>Fm3m</i>   | <i>Fm3m</i>   |
| T1kAFM         | <i>Fmmm</i><br>( <i>Cmca</i> )           | <i>Fmmm</i>   |
| T2kAFM         | <i>Cmca</i>                              | <i>Cmca</i>   | <i>Cmca</i>   | <i>Cmca</i>   | <i>Cmca</i>   | <i>Cmca</i>   | <i>Cmca</i>   | <i>Cmca</i>   |
| T3kAFM         | <i>Pa3</i>                               | <i>Pa3</i>    | <i>Pa3</i>    | <i>Pa3</i>    | <i>Pa3</i>    | <i>Pa3</i>    | <i>Pa3</i>    | <i>Pa3</i>    |

**Table S5.** Cell lengths and cell angles, calculated when considering van der Waal's dispersion corrections (D3) of Grimme *et al.* [1], i.e. PBEsol+U+SOC+D3 ( $U = 0 - 7$  eV), for cubic PuH<sub>2</sub>. a, b and c in Å. Cell volume in Å<sup>3</sup>.  $\alpha$ ,  $\beta$ ,  $\gamma$  in degree.

| Magnetic order | Parameter      | PBEsol+U+SOC+D3 - $U$ (eV) |        |        |        |        |        |        |        |
|----------------|----------------|----------------------------|--------|--------|--------|--------|--------|--------|--------|
|                |                | 0                          | 1      | 2      | 3      | 4      | 5      | 6      | 7      |
| FM <100>       | a              | 5.11                       | 5.19   | 5.22   | 5.25   | 5.27   | 5.29   | 5.31   | 5.33   |
|                | b              | 5.11                       | 5.1    | 5.22   | 5.25   | 5.27   | 5.29   | 5.31   | 5.33   |
|                | c              | 5.11                       | 5.19   | 5.22   | 5.25   | 5.27   | 5.29   | 5.30   | 5.31   |
|                | $\alpha$       | 90.00                      | 90.00  | 90.00  | 90.00  | 90.00  | 90.00  | 90.00  | 90.00  |
|                | $\beta$        | 90.00                      | 90.00  | 90.00  | 90.00  | 90.00  | 90.00  | 90.00  | 90.00  |
|                | $\gamma$       | 90.00                      | 90.00  | 90.00  | 90.00  | 90.00  | 90.00  | 90.00  | 90.00  |
|                | Lattice Volume | 133.51                     | 138.28 | 142.17 | 144.65 | 146.65 | 148.23 | 149.58 | 150.67 |
| FM <110>       | a              | 5.10                       | 5.18   | 5.23   | 5.26   | 5.28   | 5.30   | 5.31   | 5.32   |
|                | b              | 5.10                       | 5.18   | 5.23   | 5.26   | 5.28   | 5.30   | 5.31   | 5.32   |
|                | c              | 5.14                       | 5.18   | 5.21   | 5.24   | 5.27   | 5.30   | 5.31   | 5.32   |
|                | $\alpha$       | 90.00                      | 90.00  | 90.00  | 90.00  | 90.00  | 89.99  | 90.00  | 90.00  |
|                | $\beta$        | 90.00                      | 90.00  | 90.00  | 90.00  | 90.00  | 90.01  | 90.00  | 90.00  |
|                | $\gamma$       | 89.49                      | 89.66  | 89.76  | 89.84  | 89.90  | 89.98  | 90.01  | 90.04  |
|                | Lattice Volume | 133.38                     | 139.07 | 142.66 | 145.15 | 147.05 | 148.66 | 149.89 | 150.79 |
| FM <111>       | a              | 5.11                       | 5.18   | 5.22   | 5.25   | 5.28   | 5.30   | 5.31   | 5.32   |
|                | b              | 5.11                       | 5.18   | 5.22   | 5.25   | 5.28   | 5.30   | 5.31   | 5.32   |
|                | c              | 5.11                       | 5.18   | 5.22   | 5.25   | 5.28   | 5.30   | 5.31   | 5.32   |
|                | $\alpha$       | 89.60                      | 89.76  | 89.80  | 89.87  | 89.89  | 89.93  | 89.97  | 89.98  |
|                | $\beta$        | 89.60                      | 89.76  | 89.80  | 89.87  | 89.89  | 89.93  | 89.97  | 89.98  |
|                | $\gamma$       | 89.60                      | 89.76  | 89.80  | 89.87  | 89.89  | 89.93  | 89.97  | 89.98  |
|                | Lattice Volume | 133.24                     | 139.16 | 142.60 | 145.01 | 146.98 | 148.54 | 149.77 | 150.72 |
| L1kAFM         | a              | 5.01                       | 5.09   | 5.17   | 5.21   | 5.24   | 5.27   | 5.29   | 5.31   |
|                | b              | 5.01                       | 5.09   | 5.17   | 5.21   | 5.24   | 5.27   | 5.29   | 5.31   |
|                | c              | 5.26                       | 5.29   | 5.30   | 5.30   | 5.32   | 5.33   | 5.34   | 5.34   |
|                | $\alpha$       | 90.00                      | 90.00  | 90.00  | 90.00  | 90.00  | 90.00  | 90.00  | 90.00  |
|                | $\beta$        | 90.00                      | 90.00  | 90.00  | 90.00  | 90.00  | 90.00  | 90.00  | 90.00  |
|                | $\gamma$       | 90.00                      | 90.00  | 90.00  | 90.00  | 90.00  | 90.00  | 90.00  | 90.00  |
|                | Lattice Volume | 131.94                     | 137.17 | 141.38 | 144.20 | 146.36 | 147.99 | 149.37 | 150.40 |
| L2kAFM         | a              | 5.11                       | 5.18   | 5.23   | 5.26   | 5.29   | 5.31   | 5.32   | 5.33   |
|                | b              | 5.11                       | 5.18   | 5.23   | 5.26   | 5.29   | 5.31   | 5.32   | 5.33   |
|                | c              | 5.0582                     | 5.14   | 5.18   | 5.22   | 5.25   | 5.28   | 5.29   | 5.30   |
|                | $\alpha$       | 90.00                      | 90.00  | 90.00  | 90.00  | 90.00  | 90.00  | 90.00  | 90.00  |
|                | $\beta$        | 90.00                      | 90.00  | 90.00  | 90.00  | 90.00  | 90.00  | 90.00  | 90.00  |
|                | $\gamma$       | 90.00                      | 90.00  | 90.00  | 90.00  | 90.00  | 90.00  | 90.00  | 90.00  |
|                | Lattice Volume | 132.15                     | 138.00 | 141.89 | 144.69 | 146.82 | 148.51 | 149.78 | 150.87 |
| L3kAFM         | a              | 5.09                       | 5.16   | 5.22   | 5.25   | 5.27   | 5.30   | 5.31   | 5.34   |
|                | b              | 5.09                       | 5.16   | 5.22   | 5.25   | 5.27   | 5.30   | 5.31   | 5.34   |
|                | c              | 5.09                       | 5.16   | 5.22   | 5.25   | 5.27   | 5.30   | 5.31   | 5.34   |
|                | $\alpha$       | 90.00                      | 90.00  | 90.00  | 90.00  | 90.00  | 90.00  | 90.00  | 90.00  |
|                | $\beta$        | 90.00                      | 90.00  | 90.00  | 90.00  | 90.00  | 90.00  | 90.00  | 90.00  |
|                | $\gamma$       | 90.00                      | 90.00  | 90.00  | 90.00  | 90.00  | 90.00  | 90.00  | 90.00  |
|                | Lattice Volume | 132.19                     | 137.77 | 141.85 | 144.65 | 146.59 | 148.67 | 149.80 | 151.87 |
| T1kAFM         | a              | 5.13                       | 5.16   | 5.20   | 5.23   | 5.26   | 5.28   | 5.30   | 5.31   |
|                | b              | 5.14                       | 5.17   | 5.20   | 5.23   | 5.26   | 5.28   | 5.30   | 5.31   |
|                | c              | 4.99                       | 5.12   | 5.21   | 5.26   | 5.29   | 5.30   | 5.32   | 5.33   |
|                | $\alpha$       | 90.00                      | 90.00  | 90.00  | 90.00  | 90.00  | 90.00  | 90.00  | 90.00  |
|                | $\beta$        | 90.00                      | 90.00  | 90.00  | 90.00  | 90.00  | 90.00  | 90.00  | 90.00  |
|                | $\gamma$       | 90.00                      | 90.00  | 90.00  | 90.00  | 90.00  | 90.00  | 90.00  | 90.00  |
|                | Lattice Volume | 131.82                     | 136.57 | 141.06 | 144.07 | 146.34 | 148.06 | 149.39 | 150.39 |
| T2kAFM         | a              | 5.09                       | 5.17   | 5.19   | 5.23   | 5.26   | 5.28   | 5.30   | 5.31   |
|                | b              | 5.10                       | 5.15   | 5.20   | 5.25   | 5.27   | 5.31   | 5.31   | 5.32   |
|                | c              | 5.08                       | 5.07   | 5.25   | 5.27   | 5.29   | 5.29   | 5.33   | 5.33   |
|                | $\alpha$       | 90.00                      | 90.00  | 90.00  | 90.00  | 90.00  | 90.00  | 90.00  | 90.00  |
|                | $\beta$        | 90.00                      | 90.00  | 90.00  | 90.00  | 90.00  | 90.00  | 90.00  | 90.00  |
|                | $\gamma$       | 90.00                      | 90.00  | 90.00  | 90.00  | 90.00  | 90.00  | 90.00  | 90.00  |
|                | Lattice Volume | 131.84                     | 137.32 | 141.68 | 144.66 | 146.80 | 148.48 | 149.76 | 150.78 |
| T3kAFM         | a              | 5.09                       | 5.16   | 5.21   | 5.25   | 5.27   | 5.29   | 5.31   | 5.32   |
|                | b              | 5.09                       | 5.16   | 5.21   | 5.25   | 5.27   | 5.29   | 5.31   | 5.32   |
|                | c              | 5.09                       | 5.16   | 5.21   | 5.25   | 5.27   | 5.29   | 5.31   | 5.32   |
|                | $\alpha$       | 90.00                      | 90.00  | 90.00  | 90.00  | 90.00  | 90.00  | 90.00  | 90.00  |
|                | $\beta$        | 90.00                      | 90.00  | 90.00  | 90.00  | 90.00  | 90.00  | 90.00  | 90.00  |
|                | $\gamma$       | 90.00                      | 90.00  | 90.00  | 90.00  | 90.00  | 90.00  | 90.00  | 90.00  |
|                | Lattice Volume | 131.51                     | 137.27 | 141.67 | 144.58 | 146.78 | 148.28 | 149.69 | 150.64 |

**Table S6.** Cell lengths and cell angles, calculated when considering van der Waal's dispersion corrections (D3) of Grimme *et al.* [1], i.e. PBEsol+U+SOC+D3 ( $U = 0 - 7$  eV) for cubic PuH<sub>3</sub>. A, b and c in Å. Cell volume in Å<sup>3</sup>.  $\alpha$ ,  $\beta$ ,  $\gamma$  in degree.

| Magnetic order | Parameter      | PBEsol+U+SOC+D3 - $U$ (eV) |        |        |        |        |        |        |        |
|----------------|----------------|----------------------------|--------|--------|--------|--------|--------|--------|--------|
|                |                | 0                          | 1      | 2      | 3      | 4      | 5      | 6      | 7      |
| FM <100>       | a              | 4.93                       | 5.06   | 5.10   | 5.16   | 5.21   | 5.24   | 5.28   | 5.30   |
|                | b              | 5.15                       | 5.15   | 5.18   | 5.20   | 5.21   | 5.22   | 5.22   | 5.24   |
|                | c              | 5.15                       | 5.15   | 5.18   | 5.20   | 5.21   | 5.22   | 5.22   | 5.24   |
|                | $\alpha$       | 90.00                      | 90.00  | 90.00  | 90.00  | 90.00  | 90.00  | 90.00  | 90.00  |
|                | $\beta$        | 90.00                      | 90.00  | 90.00  | 90.00  | 90.00  | 90.00  | 90.00  | 90.00  |
|                | $\gamma$       | 90.00                      | 90.00  | 90.00  | 90.00  | 90.00  | 90.00  | 90.00  | 90.00  |
|                | Lattice Volume | 130.59                     | 134.13 | 137.03 | 139.51 | 141.4  | 142.95 | 144.22 | 145.17 |
| FM <110>       | a              | 5.06                       | 5.10   | 5.14   | 5.16   | 5.19   | 5.21   | 5.23   | 5.25   |
|                | b              | 5.06                       | 5.10   | 5.14   | 5.16   | 5.19   | 5.21   | 5.23   | 5.25   |
|                | c              | 5.11                       | 5.16   | 5.20   | 5.24   | 5.25   | 5.27   | 5.26   | 5.27   |
|                | $\alpha$       | 90.00                      | 90.00  | 90.00  | 90.01  | 90.00  | 90.01  | 90.00  | 90.00  |
|                | $\beta$        | 90.00                      | 90.00  | 90.00  | 89.99  | 90.00  | 89.99  | 90.00  | 90.00  |
|                | $\gamma$       | 89.48                      | 90.03  | 89.71  | 89.83  | 89.89  | 89.92  | 89.95  | 89.96  |
|                | Lattice Volume | 130.79                     | 134.44 | 137.63 | 139.82 | 141.62 | 143.08 | 144.22 | 145.06 |
| FM <111>       | a              | 5.08                       | 5.12   | 5.16   | 5.19   | 5.21   | 5.23   | 5.24   | 5.25   |
|                | b              | 5.08                       | 5.12   | 5.16   | 5.19   | 5.21   | 5.23   | 5.24   | 5.25   |
|                | c              | 5.08                       | 5.12   | 5.16   | 5.18   | 5.21   | 5.23   | 5.24   | 5.25   |
|                | $\alpha$       | 89.54                      | 89.82  | 89.85  | 89.85  | 89.87  | 89.88  | 89.83  | 89.88  |
|                | $\beta$        | 89.54                      | 89.82  | 89.85  | 89.85  | 89.87  | 89.88  | 89.83  | 89.88  |
|                | $\gamma$       | 89.54                      | 89.82  | 89.85  | 89.85  | 89.87  | 89.88  | 89.83  | 89.88  |
|                | Lattice Volume | 130.69                     | 134.37 | 137.36 | 139.78 | 141.73 | 143.21 | 144.07 | 144.96 |
| L1kAFM         | a              | 5.07                       | 5.13   | 5.16   | 5.15   | 5.17   | 5.18   | 5.19   | 5.20   |
|                | b              | 5.07                       | 5.13   | 5.16   | 5.15   | 5.17   | 5.18   | 5.19   | 5.20   |
|                | c              | 5.10                       | 5.12   | 5.16   | 5.27   | 5.30   | 5.34   | 5.36   | 5.38   |
|                | $\alpha$       | 90.00                      | 90.00  | 90.00  | 90.00  | 90.00  | 90.00  | 90.00  | 90.00  |
|                | $\beta$        | 90.00                      | 90.00  | 90.00  | 90.00  | 90.00  | 90.00  | 90.00  | 90.00  |
|                | $\gamma$       | 90.00                      | 90.00  | 90.00  | 90.00  | 90.00  | 90.00  | 90.00  | 90.00  |
|                | Lattice Volume | 131.23                     | 134.57 | 137.69 | 139.99 | 141.87 | 143.42 | 144.59 | 145.51 |
| L2kAFM         | a              | 5.07                       | 5.12   | 5.17   | 5.21   | 5.24   | 5.24   | 5.26   | 5.27   |
|                | b              | 5.07                       | 5.12   | 5.17   | 5.21   | 5.24   | 5.24   | 5.26   | 5.27   |
|                | c              | 5.10                       | 5.16   | 5.17   | 5.18   | 5.18   | 5.24   | 5.23   | 5.24   |
|                | $\alpha$       | 90.00                      | 90.00  | 90.00  | 90.00  | 90.00  | 90.00  | 90.00  | 90.00  |
|                | $\beta$        | 90.00                      | 90.00  | 90.00  | 90.00  | 90.00  | 90.00  | 90.00  | 90.00  |
|                | $\gamma$       | 90.00                      | 90.00  | 90.00  | 90.00  | 90.00  | 90.00  | 90.00  | 90.00  |
|                | Lattice Volume | 131.2                      | 135.19 | 138.18 | 140.44 | 142.24 | 143.92 | 144.98 | 145.63 |
| L3kAFM         | a              | 5.08                       | 5.14   | 5.17   | 5.20   | 5.22   | 5.24   | 5.25   | 5.26   |
|                | b              | 5.08                       | 5.14   | 5.17   | 5.20   | 5.22   | 5.24   | 5.25   | 5.26   |
|                | c              | 5.08                       | 5.14   | 5.17   | 5.20   | 5.22   | 5.24   | 5.25   | 5.26   |
|                | $\alpha$       | 90.00                      | 90.00  | 90.00  | 90.00  | 90.00  | 90.00  | 90.00  | 90.00  |
|                | $\beta$        | 90.00                      | 90.00  | 90.00  | 90.00  | 90.00  | 90.00  | 90.00  | 90.00  |
|                | $\gamma$       | 90.00                      | 90.00  | 90.00  | 90.00  | 90.00  | 90.00  | 90.00  | 90.00  |
|                | Lattice Volume | 130.98                     | 135.60 | 138.33 | 140.53 | 142.34 | 143.82 | 144.98 | 145.83 |
| T1kAFM         | a              | 4.99                       | 5.08   | 5.10   | 5.12   | 5.09   | 4.96   | 4.97   | 4.99   |
|                | b              | 4.89                       | 5.03   | 5.10   | 5.15   | 5.13   | 5.01   | 5.01   | 5.02   |
|                | c              | 5.34                       | 5.26   | 5.29   | 5.32   | 5.45   | 5.81   | 5.84   | 5.84   |
|                | $\alpha$       | 90.00                      | 90.00  | 90.00  | 90.00  | 90.00  | 90.00  | 90.00  | 90.00  |
|                | $\beta$        | 90.00                      | 90.00  | 90.00  | 90.00  | 90.00  | 90.00  | 90.00  | 90.00  |
|                | $\gamma$       | 90.00                      | 90.00  | 90.00  | 90.00  | 90.00  | 90.00  | 90.00  | 90.00  |
|                | Lattice Volume | 130.16                     | 134.42 | 137.56 | 140.13 | 142.17 | 144.18 | 145.39 | 146.26 |
| T2kAFM         | a              | 4.99                       | 5.17   | 5.22   | 5.21   | 5.23   | 5.23   | 5.23   | 5.22   |
|                | b              | 4.89                       | 5.07   | 5.09   | 5.15   | 5.18   | 5.20   | 5.20   | 5.22   |
|                | c              | 5.34                       | 5.15   | 5.19   | 5.23   | 5.26   | 5.28   | 5.32   | 5.36   |
|                | $\alpha$       | 90.00                      | 90.00  | 90.00  | 90.00  | 90.00  | 90.00  | 90.00  | 90.00  |
|                | $\beta$        | 90.00                      | 90.00  | 90.00  | 90.00  | 90.00  | 90.00  | 90.00  | 90.00  |
|                | $\gamma$       | 90.00                      | 90.00  | 90.00  | 90.00  | 90.00  | 90.00  | 90.00  | 90.00  |
|                | Lattice Volume | 130.17                     | 135.11 | 137.92 | 140.34 | 142.19 | 143.68 | 144.83 | 145.72 |
| T3kAFM         | a              | 5.08                       | 5.13   | 5.17   | 5.20   | 5.22   | 5.24   | 5.25   | 5.26   |
|                | b              | 5.08                       | 5.13   | 5.17   | 5.20   | 5.22   | 5.24   | 5.25   | 5.26   |
|                | c              | 5.08                       | 5.13   | 5.17   | 5.20   | 5.22   | 5.24   | 5.25   | 5.26   |
|                | $\alpha$       | 90.00                      | 90.00  | 90.00  | 90.00  | 90.00  | 90.00  | 90.00  | 90.00  |
|                | $\beta$        | 90.00                      | 90.00  | 90.00  | 90.00  | 90.00  | 90.00  | 90.00  | 90.00  |
|                | $\gamma$       | 90.00                      | 90.00  | 90.00  | 90.00  | 90.00  | 90.00  | 90.00  | 90.00  |
|                | Lattice Volume | 131.29                     | 135.14 | 138.01 | 140.37 | 142.19 | 143.64 | 144.75 | 145.63 |

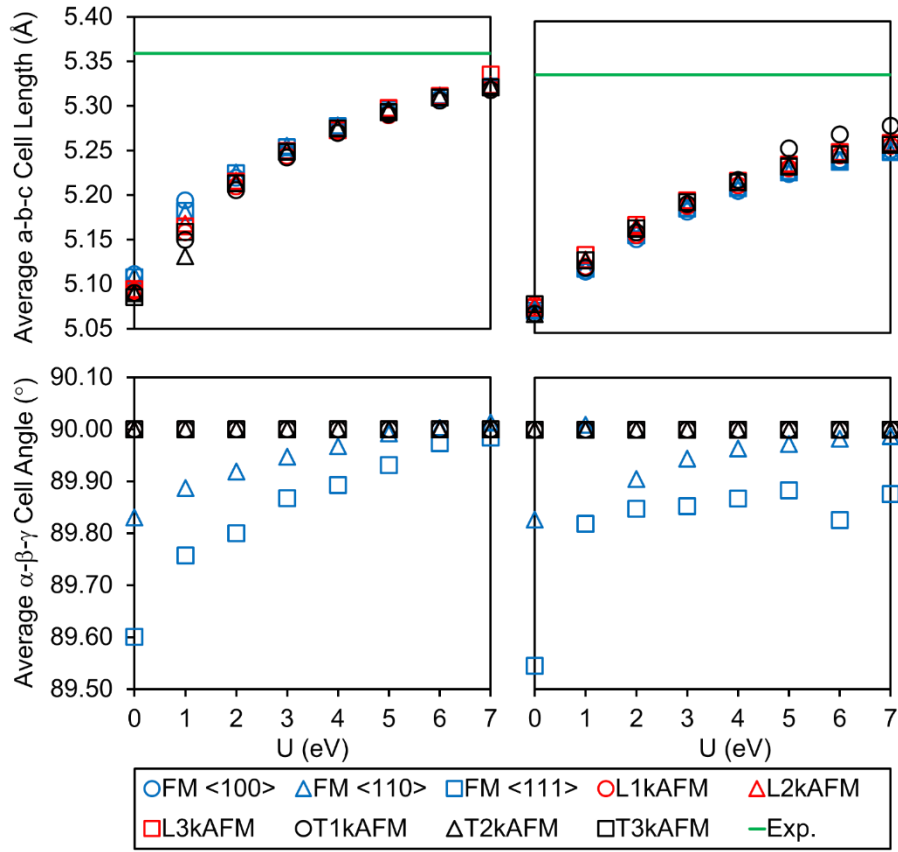

**Figure S1.** Average cell lengths a-b-c (Å) for cubic (a) PuH<sub>2</sub> and (b) PuH<sub>3</sub> and average cell angles  $\alpha$ - $\beta$ - $\gamma$  (degree) for (c) PuH<sub>2</sub> and (d) PuH<sub>3</sub> calculated the inclusion of van der Waals correction Grimme *et al.* [1], *i.e.* PBEsol+ $U$ +SOC+D3 ( $U$  = 0 - 7 eV). Circles, triangles and squares symbols represent the <100>, <110> and <111> alignments respectively for FM orders in blue, longitudinal AFM in red, and transverse AFM in black. Experimental cell lengths represented in green for PuH<sub>2</sub> (Mulford *et al.* [2]) and PuH<sub>3</sub> (Muromura *et al.* [3]).

### Section S3: Magnetic, structural and electronic properties of cubic PuH<sub>2</sub> and PuH<sub>3</sub>

**Table S7.** Magnetic wavevectors in PuH<sub>2</sub> and PuH<sub>3</sub> with ferromagnetic <100>, <110> and <111>, longitudinal antiferromagnetic 1k, 2k and 3k and transverse antiferromagnetic 1k, 2k and 3k orders after optimisation using HSE06sol+SOC.

| PuH <sub>2</sub>               |              |                 |                   |
|--------------------------------|--------------|-----------------|-------------------|
| Ferromagnetic                  |              |                 |                   |
| Pu ionic position              | FM <100>     | FM <110>        | FM <111>          |
| (0, 0, 0)                      | (0, 0, 4.7)  | (0, 3.3, 3.3)   | (2.7, 2.7, 2.7)   |
| (0.5, 0.5, 0)                  | (0, 0, 4.7)  | (0, 3.3, 3.3)   | (2.7, 2.8, 2.7)   |
| (0.5, 0, 0.5)                  | (0, 0, 4.7)  | (0, 3.3, 3.3)   | (2.8, 2.7, 2.7)   |
| (0, 0.5, 0.5)                  | (0, 0, 4.7)  | (0, 3.3, 3.3)   | (2.7, 2.7, 2.7)   |
| Longitudinal antiferromagnetic |              |                 |                   |
| Pu ionic position              | L1kAFM       | L2kAFM          | L3kAFM            |
| (0, 0, 0)                      | (0, 0, 4.6)  | (0, 3.3, 3.3)   | (2.7, 2.7, 2.7)   |
| (0.5, 0.5, 0)                  | (0, 0, 4.6)  | (0, -3.2, 3.3)  | (-2.7, -2.7, 2.7) |
| (0.5, 0, 0.5)                  | (0, 0, -4.6) | (0, 3.2, -3.3)  | (-2.7, 2.7, -2.7) |
| (0, 0.5, 0.5)                  | (0, 0, -4.6) | (0, -3.3, -3.3) | (2.7, -2.7, 2.7)  |
| Transverse antiferromagnetic   |              |                 |                   |
| Pu ionic position              | T1kAFM       | T2kAFM          | T3kAFM            |
| (0, 0, 0)                      | (0, 0, 4.6)  | (0, 3.1, 3.4)   | (2.7, 2.7, 2.7)   |
| (0.5, 0.5, 0)                  | (0, 0, -4.6) | (0, -3.1, -3.4) | (2.7, -2.7, -2.7) |
| (0.5, 0, 0.5)                  | (0, 0, 4.6)  | (0, -3.1, 3.4)  | (-2.7, -2.7, 2.7) |
| (0, 0.5, 0.5)                  | (0, 0, -4.6) | (0, 3.1, -3.4)  | (-2.7, 2.7, -2.7) |
| PuH <sub>3</sub>               |              |                 |                   |
| Ferromagnetic                  |              |                 |                   |
| Pu ionic position              | FM <100>     | FM <110>        | FM <111>          |
| (0, 0, 0)                      | (0, 0, 4.6)  | (0, 3.2, 3.2)   | (2.7, 2.7, 2.7)   |
| (0.5, 0.5, 0)                  | (0, 0, 4.6)  | (0, 3.3, 3.2)   | (2.7, 2.7, 2.6)   |
| (0.5, 0, 0.5)                  | (0, 0, 4.6)  | (0, 3.3, 3.3)   | (2.7, 2.6, 2.7)   |
| (0, 0.5, 0.5)                  | (0, 0, 4.6)  | (0, 3.2, 3.2)   | (2.6, 2.7, 2.7)   |
| Longitudinal antiferromagnetic |              |                 |                   |
| Pu ionic position              | L1kAFM       | L2kAFM          | L3kAFM            |
| (0, 0, 0)                      | (0, 0, 4.5)  | (0, 3.2, 3.2)   | (2.6, 2.6, 2.6)   |
| (0.5, 0.5, 0)                  | (0, 0, 4.5)  | (0, -3.2, 3.2)  | (-2.6, -2.6, 2.6) |
| (0.5, 0, 0.5)                  | (0, 0, -4.5) | (0, 3.2, -3.2)  | (-2.6, 2.6, -2.6) |
| (0, 0.5, 0.5)                  | (0, 0, -4.5) | (0, -3.2, -3.2) | (2.6, -2.6, 2.6)  |
| Transverse antiferromagnetic   |              |                 |                   |
| Pu ionic position              | T1kAFM       | T2kAFM          | T3kAFM            |
| (0, 0, 0)                      | (0, 0, 4.6)  | (0, 3.2, 3.2)   | (2.6, 2.6, 2.6)   |
| (0.5, 0.5, 0)                  | (0, 0, -4.6) | (0, -3.2, -3.2) | (2.6, -2.6, -2.6) |
| (0.5, 0, 0.5)                  | (0, 0, 4.6)  | (0, -3.2, 3.2)  | (-2.6, -2.6, 2.6) |
| (0, 0.5, 0.5)                  | (0, 0, -4.6) | (0, 3.2, -3.2)  | (-2.6, 2.6, -2.6) |



**Table S8.** Cell lengths and cell angles for cubic PuH<sub>2</sub> using PBEsol+*U*+SOC (*U* = 0 - 7 eV) and HSE06sol+SOC methods. a, b and c in Å. Cell volume in Å<sup>3</sup>.  $\alpha$ ,  $\beta$ ,  $\gamma$  in degree.

| Magnetic order | Parameter   | PBEsol+ <i>U</i> +SOC - <i>U</i> (eV) |        |        |        |        |        |        |        | HSE06sol<br>+SOC |
|----------------|-------------|---------------------------------------|--------|--------|--------|--------|--------|--------|--------|------------------|
|                |             | 0                                     | 1      | 2      | 3      | 4      | 5      | 6      | 7      |                  |
| FM <100>       | a           | 5.20                                  | 5.28   | 5.29   | 5.32   | 5.34   | 5.36   | 5.37   | 5.39   | 5.29             |
|                | b           | 5.20                                  | 5.28   | 5.29   | 5.32   | 5.34   | 5.36   | 5.37   | 5.39   | 5.29             |
|                | c           | 5.20                                  | 5.21   | 5.29   | 5.32   | 5.34   | 5.35   | 5.36   | 5.36   | 5.33             |
|                | $\alpha$    | 90.00                                 | 90.00  | 90.00  | 90.00  | 90.00  | 90.00  | 90.00  | 90.00  | 90.00            |
|                | $\beta$     | 90.00                                 | 90.00  | 90.00  | 90.00  | 90.00  | 90.00  | 90.00  | 90.00  | 90.00            |
|                | $\gamma$    | 90.00                                 | 90.00  | 90.00  | 90.00  | 90.00  | 90.00  | 90.00  | 90.00  | 90.00            |
|                | Cell Volume | 140.46                                | 144.89 | 148.06 | 150.32 | 152.20 | 153.66 | 154.80 | 155.79 | 149.36           |
| FM <110>       | a           | 5.19                                  | 5.26   | 5.30   | 5.33   | 5.35   | 5.36   | 5.37   | 5.38   | 5.33             |
|                | b           | 5.19                                  | 5.26   | 5.30   | 5.33   | 5.35   | 5.36   | 5.37   | 5.38   | 5.33             |
|                | c           | 5.21                                  | 5.27   | 5.28   | 5.31   | 5.34   | 5.36   | 5.37   | 5.38   | 5.28             |
|                | $\alpha$    | 90.00                                 | 90.00  | 90.00  | 90.00  | 90.00  | 90.00  | 90.00  | 89.99  | 90.00            |
|                | $\beta$     | 90.00                                 | 90.01  | 90.00  | 90.00  | 90.00  | 90.00  | 90.00  | 90.01  | 90.00            |
|                | $\gamma$    | 89.72                                 | 89.82  | 89.82  | 89.89  | 89.92  | 89.97  | 89.98  | 90.01  | 89.85            |
|                | Cell Volume | 140.26                                | 145.79 | 148.55 | 150.76 | 152.58 | 153.98 | 155.15 | 156.03 | 149.80           |
| FM <111>       | a           | 5.19                                  | 5.26   | 5.29   | 5.32   | 5.34   | 5.36   | 5.37   | 5.38   | 5.31             |
|                | b           | 5.19                                  | 5.26   | 5.29   | 5.32   | 5.34   | 5.36   | 5.37   | 5.38   | 5.31             |
|                | c           | 5.19                                  | 5.26   | 5.29   | 5.32   | 5.34   | 5.36   | 5.37   | 5.38   | 5.31             |
|                | $\alpha$    | 89.77                                 | 89.85  | 89.84  | 89.87  | 89.91  | 89.94  | 89.97  | 89.98  | 89.89            |
|                | $\beta$     | 89.77                                 | 89.85  | 89.84  | 89.87  | 89.91  | 89.94  | 89.97  | 89.98  | 89.89            |
|                | $\gamma$    | 89.77                                 | 89.85  | 89.84  | 89.87  | 89.91  | 89.94  | 89.97  | 89.98  | 89.89            |
|                | Cell Volume | 140.15                                | 145.73 | 148.42 | 150.65 | 152.45 | 153.93 | 155.03 | 155.93 | 149.66           |
| L1kAFM         | a           | 5.15                                  | 5.20   | 5.24   | 5.28   | 5.31   | 5.34   | 5.35   | 5.37   | 5.22             |
|                | b           | 5.15                                  | 5.20   | 5.24   | 5.28   | 5.31   | 5.34   | 5.35   | 5.37   | 5.22             |
|                | c           | 5.23                                  | 5.33   | 5.35   | 5.37   | 5.38   | 5.39   | 5.40   | 5.40   | 5.43             |
|                | $\alpha$    | 90.00                                 | 90.00  | 90.00  | 90.00  | 90.00  | 90.00  | 90.00  | 90.00  | 90.00            |
|                | $\beta$     | 90.00                                 | 90.00  | 90.00  | 90.00  | 90.00  | 90.00  | 90.00  | 90.00  | 90.00            |
|                | $\gamma$    | 90.00                                 | 90.00  | 90.00  | 90.00  | 90.00  | 90.00  | 90.00  | 90.00  | 90.00            |
|                | Cell Volume | 138.80                                | 143.87 | 147.24 | 149.80 | 151.78 | 153.39 | 154.72 | 155.58 | 147.77           |
| L2kAFM         | a           | 5.19                                  | 5.26   | 5.30   | 5.33   | 5.35   | 5.37   | 5.38   | 5.39   | 5.29             |
|                | b           | 5.19                                  | 5.26   | 5.30   | 5.33   | 5.35   | 5.37   | 5.38   | 5.39   | 5.29             |
|                | c           | 5.16                                  | 5.22   | 5.26   | 5.29   | 5.32   | 5.34   | 5.36   | 5.37   | 5.31             |
|                | $\alpha$    | 90.00                                 | 90.00  | 90.00  | 90.00  | 90.00  | 90.00  | 90.00  | 90.00  | 90.00            |
|                | $\beta$     | 90.00                                 | 90.00  | 90.00  | 90.00  | 90.00  | 90.00  | 90.00  | 90.00  | 90.00            |
|                | $\gamma$    | 90.00                                 | 90.00  | 90.00  | 90.00  | 90.00  | 90.00  | 90.00  | 90.00  | 90.00            |
|                | Cell Volume | 138.86                                | 144.39 | 147.79 | 150.32 | 152.30 | 153.84 | 155.15 | 156.02 | 148.55           |
| L3kAFM         | a           | 5.18                                  | 5.24   | 5.29   | 5.32   | 5.34   | 5.36   | 5.37   | 5.38   | 5.29             |
|                | b           | 5.18                                  | 5.24   | 5.29   | 5.32   | 5.34   | 5.36   | 5.37   | 5.38   | 5.29             |
|                | c           | 5.18                                  | 5.24   | 5.29   | 5.32   | 5.34   | 5.36   | 5.37   | 5.38   | 5.29             |
|                | $\alpha$    | 90.00                                 | 90.00  | 90.00  | 90.00  | 90.00  | 90.00  | 90.00  | 90.00  | 90.00            |
|                | $\beta$     | 90.00                                 | 90.00  | 90.00  | 90.00  | 90.00  | 90.00  | 90.00  | 90.00  | 90.00            |
|                | $\gamma$    | 90.00                                 | 90.00  | 90.00  | 90.00  | 90.00  | 90.00  | 90.00  | 90.00  | 90.00            |
|                | Cell Volume | 138.84                                | 144.05 | 147.82 | 150.25 | 152.36 | 153.89 | 155.17 | 156.01 | 148.44           |
| T1kAFM         | a           | 5.20                                  | 5.23   | 5.27   | 5.30   | 5.33   | 5.35   | 5.37   | 5.38   | 5.26             |
|                | b           | 5.21                                  | 5.25   | 5.27   | 5.30   | 5.33   | 5.34   | 5.36   | 5.37   | 5.25             |
|                | c           | 5.11                                  | 5.21   | 5.29   | 5.33   | 5.35   | 5.37   | 5.38   | 5.39   | 5.34             |
|                | $\alpha$    | 90.00                                 | 90.00  | 90.00  | 90.00  | 90.00  | 90.00  | 90.00  | 90.00  | 90.00            |
|                | $\beta$     | 90.00                                 | 90.00  | 90.00  | 90.00  | 90.00  | 90.00  | 90.00  | 90.00  | 90.00            |
|                | $\gamma$    | 90.00                                 | 90.00  | 90.00  | 90.00  | 90.00  | 90.00  | 90.00  | 90.00  | 90.00            |
|                | Cell Volume | 138.50                                | 143.14 | 147.03 | 149.72 | 151.80 | 153.42 | 154.72 | 155.70 | 147.54           |
| T2kAFM         | a           | 5.17                                  | 5.20   | 5.26   | 5.30   | 5.33   | 5.35   | 5.36   | 5.37   | 5.31             |
|                | b           | 5.17                                  | 5.23   | 5.28   | 5.31   | 5.34   | 5.35   | 5.37   | 5.38   | 5.35             |
|                | c           | 5.18                                  | 5.28   | 5.32   | 5.34   | 5.36   | 5.37   | 5.39   | 5.40   | 5.23             |
|                | $\alpha$    | 90.00                                 | 90.00  | 90.00  | 90.00  | 90.00  | 90.00  | 90.00  | 90.00  | 90.00            |
|                | $\beta$     | 90.00                                 | 90.00  | 90.00  | 90.00  | 90.00  | 90.00  | 90.00  | 90.00  | 90.00            |
|                | $\gamma$    | 90.00                                 | 90.00  | 90.00  | 90.00  | 90.00  | 90.00  | 90.00  | 90.00  | 90.00            |
|                | Cell Volume | 138.47                                | 143.77 | 147.56 | 150.27 | 152.28 | 153.88 | 155.11 | 156.01 | 148.35           |
| T3kAFM         | a           | 5.17                                  | 5.24   | 5.28   | 5.32   | 5.34   | 5.36   | 5.37   | 5.38   | 5.29             |
|                | b           | 5.17                                  | 5.24   | 5.28   | 5.32   | 5.34   | 5.36   | 5.37   | 5.38   | 5.29             |
|                | c           | 5.17                                  | 5.24   | 5.28   | 5.32   | 5.34   | 5.36   | 5.37   | 5.38   | 5.29             |
|                | $\alpha$    | 90.00                                 | 90.00  | 90.00  | 90.00  | 90.00  | 90.00  | 90.00  | 90.00  | 90.00            |
|                | $\beta$     | 90.00                                 | 90.00  | 90.00  | 90.00  | 90.00  | 90.00  | 90.00  | 90.00  | 90.00            |
|                | $\gamma$    | 90.00                                 | 90.00  | 90.00  | 90.00  | 90.00  | 90.00  | 90.00  | 90.00  | 90.00            |
|                | Cell Volume | 138.31                                | 143.83 | 147.56 | 150.33 | 152.19 | 153.69 | 154.98 | 155.84 | 148.28           |

**Table S9.** Cell lengths and cell angles for PuH<sub>3</sub> using PBEsol+*U*+SOC (*U* = 0 - 7 eV) and HSE06sol+SOC methods. Cell volume in Å<sup>3</sup>.  $\alpha$ ,  $\beta$ ,  $\gamma$  in degree.

| Magnetic order | Parameter                     | PBEsol+ <i>U</i> +SOC - <i>U</i> (eV) |        |        |        |        |        |        |        | HSE06sol<br>+SOC |
|----------------|-------------------------------|---------------------------------------|--------|--------|--------|--------|--------|--------|--------|------------------|
|                |                               | 0                                     | 1      | 2      | 3      | 4      | 5      | 6      | 7      |                  |
| FM <100>       | a                             | 5.21                                  | 5.20   | 5.23   | 5.25   | 5.26   | 5.27   | 5.27   | 5.28   | 5.24             |
|                | b                             | 5.21                                  | 5.20   | 5.23   | 5.25   | 5.26   | 5.27   | 5.27   | 5.28   | 5.24             |
|                | c                             | 5.02                                  | 5.16   | 5.20   | 5.24   | 5.29   | 5.33   | 5.37   | 5.39   | 5.20             |
|                | $\alpha$                      | 90.00                                 | 90.00  | 90.00  | 90.00  | 90.00  | 90.00  | 90.00  | 90.00  | 90.00            |
|                | $\beta$                       | 90.00                                 | 90.00  | 90.00  | 90.00  | 90.00  | 90.00  | 90.00  | 90.00  | 90.00            |
|                | $\gamma$                      | 90.00                                 | 90.00  | 90.00  | 90.00  | 90.00  | 90.00  | 90.00  | 90.00  | 90.00            |
|                | Cell Volume                   | 136.07                                | 139.58 | 142.29 | 144.53 | 146.41 | 147.92 | 149.15 | 150.07 | 143.12           |
| FM <110>       | a                             | 5.13                                  | 5.17   | 5.21   | 5.23   | 5.26   | 5.28   | 5.29   | 5.30   | 5.19             |
|                | b                             | 5.13                                  | 5.17   | 5.21   | 5.23   | 5.26   | 5.28   | 5.29   | 5.30   | 5.19             |
|                | c                             | 5.18                                  | 5.23   | 5.27   | 5.30   | 5.30   | 5.31   | 5.32   | 5.33   | 5.33             |
|                | $\alpha$                      | 90.00                                 | 89.99  | 90.00  | 90.00  | 90.00  | 90.00  | 90.00  | 90.00  | 90.00            |
|                | $\beta$                       | 90.00                                 | 90.01  | 90.00  | 90.00  | 90.00  | 90.00  | 90.00  | 90.00  | 90.00            |
|                | $\gamma$                      | 89.61                                 | 90.03  | 89.78  | 89.87  | 89.92  | 89.96  | 89.94  | 89.96  | 89.80            |
|                | Cell Volume                   | 136.23                                | 139.83 | 142.83 | 144.90 | 146.65 | 148.07 | 149.14 | 149.96 | 144.20           |
| FM <111>       | a                             | 5.14                                  | 5.19   | 5.22   | 5.25   | 5.27   | 5.29   | 5.30   | 5.31   | 5.24             |
|                | b                             | 5.14                                  | 5.19   | 5.22   | 5.25   | 5.27   | 5.29   | 5.30   | 5.31   | 5.24             |
|                | c                             | 5.14                                  | 5.19   | 5.22   | 5.25   | 5.27   | 5.29   | 5.30   | 5.31   | 5.24             |
|                | $\alpha$                      | 89.69                                 | 89.84  | 89.84  | 89.85  | 89.87  | 89.89  | 89.79  | 89.85  | 89.76            |
|                | $\beta$                       | 89.69                                 | 89.84  | 89.84  | 89.85  | 89.87  | 89.89  | 89.79  | 89.85  | 89.76            |
|                | $\gamma$                      | 89.69                                 | 89.84  | 89.84  | 89.85  | 89.87  | 89.89  | 89.79  | 89.85  | 89.76            |
|                | Cell Volume                   | 136.14                                | 139.73 | 142.51 | 144.88 | 146.68 | 148.17 | 149.14 | 149.85 | 143.46           |
| L1kAFM         | a                             | 5.15                                  | 5.19   | 5.22   | 5.21   | 5.23   | 5.24   | 5.24   | 5.25   | 5.17             |
|                | b                             | 5.15                                  | 5.19   | 5.22   | 5.21   | 5.23   | 5.24   | 5.24   | 5.25   | 5.17             |
|                | c                             | 5.15                                  | 5.19   | 5.25   | 5.35   | 5.37   | 5.41   | 5.24   | 5.45   | 5.38             |
|                | $\alpha$                      | 90.00                                 | 90.00  | 90.00  | 90.00  | 90.00  | 90.00  | 90.00  | 90.00  | 90.00            |
|                | $\beta$                       | 90.00                                 | 90.00  | 90.00  | 90.00  | 90.00  | 90.00  | 90.00  | 90.00  | 90.00            |
|                | $\gamma$                      | 90.00                                 | 90.00  | 90.00  | 90.00  | 90.00  | 90.00  | 90.00  | 90.00  | 90.00            |
|                | Cell Volume                   | 136.65                                | 139.86 | 142.87 | 145.08 | 146.82 | 148.30 | 149.47 | 150.39 | 143.63           |
| L2kAFM         | a                             | 5.14                                  | 5.19   | 5.24   | 5.28   | 5.30   | 5.31   | 5.33   | 5.34   | 5.28             |
|                | b                             | 5.14                                  | 5.19   | 5.24   | 5.28   | 5.30   | 5.31   | 5.33   | 5.34   | 5.28             |
|                | c                             | 5.19                                  | 5.22   | 5.23   | 5.22   | 5.24   | 5.28   | 5.28   | 5.28   | 5.18             |
|                | $\alpha$                      | 90.00                                 | 90.00  | 90.00  | 90.00  | 90.00  | 90.00  | 90.00  | 90.00  | 90.00            |
|                | $\beta$                       | 90.00                                 | 90.00  | 90.00  | 90.00  | 90.00  | 90.00  | 90.00  | 90.00  | 90.00            |
|                | $\gamma$                      | 90.00                                 | 90.00  | 90.00  | 90.00  | 90.00  | 90.00  | 90.00  | 90.00  | 90.00            |
|                | Cell Volume                   | 136.76                                | 140.58 | 143.39 | 145.45 | 147.26 | 148.85 | 149.85 | 150.51 | 144.32           |
| L3kAFM         | a                             | 5.15                                  | 5.20   | 5.24   | 5.26   | 5.28   | 5.30   | 5.31   | 5.32   | 5.24             |
|                | b                             | 5.15                                  | 5.20   | 5.24   | 5.26   | 5.28   | 5.30   | 5.31   | 5.32   | 5.24             |
|                | c                             | 5.15                                  | 5.20   | 5.24   | 5.26   | 5.28   | 5.30   | 5.31   | 5.32   | 5.24             |
|                | $\alpha$                      | 90.00                                 | 90.00  | 90.00  | 90.00  | 90.00  | 90.00  | 90.00  | 90.00  | 90.00            |
|                | $\beta$                       | 90.00                                 | 90.00  | 90.00  | 90.00  | 90.00  | 90.00  | 90.00  | 90.00  | 90.00            |
|                | $\gamma$                      | 90.00                                 | 90.00  | 90.00  | 90.00  | 90.00  | 90.00  | 90.00  | 90.00  | 90.00            |
|                | Cell Volume                   | 136.80                                | 140.88 | 143.56 | 145.76 | 147.25 | 148.53 | 149.81 | 150.70 | 144.20           |
| T1kAFM         | a                             | 5.09                                  | 5.16   | 5.15   | 5.16   | 5.14   | 5.13   | 5.13   | 5.24   | 4.97             |
|                | b                             | 4.99                                  | 5.12   | 5.18   | 5.21   | 5.20   | 5.18   | 5.19   | 5.31   | 5.02             |
|                | c                             | 5.35                                  | 5.30   | 5.35   | 5.40   | 5.50   | 5.60   | 5.63   | 5.40   | 5.77             |
|                | $\alpha$                      | 90.00                                 | 90.00  | 90.00  | 90.00  | 90.00  | 90.00  | 90.00  | 90.00  | 90.00            |
|                | $\beta$                       | 90.00                                 | 90.00  | 90.00  | 90.00  | 90.00  | 90.00  | 90.00  | 90.00  | 90.00            |
|                | $\gamma$                      | 90.00                                 | 90.00  | 90.00  | 90.00  | 90.00  | 90.00  | 90.00  | 90.00  | 90.00            |
|                | Cell Volume                   | 135.96                                | 139.92 | 142.81 | 145.23 | 147.15 | 148.69 | 149.81 | 150.34 | 144.01           |
| T2kAFM         | a                             | 5.09                                  | 5.23   | 5.26   | 5.26   | 5.28   | 5.28   | 5.28   | 5.29   | 5.24             |
|                | b                             | 5.00                                  | 5.22   | 5.26   | 5.30   | 5.31   | 5.25   | 5.27   | 5.27   | 5.21             |
|                | c                             | 5.34                                  | 5.15   | 5.17   | 5.21   | 5.24   | 5.36   | 5.39   | 5.40   | 5.28             |
|                | $\alpha$                      | 90.00                                 | 90.00  | 90.00  | 90.00  | 90.00  | 90.00  | 90.00  | 90.00  | 90.00            |
|                | $\beta$                       | 90.00                                 | 90.00  | 90.00  | 90.00  | 90.00  | 90.00  | 90.00  | 90.00  | 90.00            |
|                | $\gamma$                      | 90.00                                 | 90.00  | 90.00  | 90.00  | 90.00  | 90.00  | 90.00  | 90.00  | 90.00            |
|                | Cell Volume                   | 135.99                                | 140.52 | 143.17 | 145.39 | 147.17 | 148.60 | 149.75 | 150.53 | 144.09           |
| T3kAFM         | a                             | 5.15                                  | 5.20   | 5.23   | 5.26   | 5.28   | 5.30   | 5.31   | 5.32   | 5.24             |
|                | b                             | 5.15                                  | 5.20   | 5.23   | 5.26   | 5.28   | 5.30   | 5.31   | 5.32   | 5.24             |
|                | c                             | 5.15                                  | 5.20   | 5.23   | 5.26   | 5.28   | 5.30   | 5.31   | 5.32   | 5.24             |
|                | $\alpha$                      | 90.00                                 | 90.00  | 90.00  | 90.00  | 90.00  | 90.00  | 90.00  | 90.00  | 90.00            |
|                | $\beta$                       | 90.00                                 | 90.00  | 90.00  | 90.00  | 90.00  | 90.00  | 90.00  | 90.00  | 90.00            |
|                | $\gamma$                      | 90.00                                 | 90.00  | 90.00  | 90.00  | 90.00  | 90.00  | 90.00  | 90.00  | 90.00            |
|                | Cell Volume (Å <sup>3</sup> ) | 136.95                                | 140.55 | 143.28 | 145.34 | 147.18 | 148.61 | 149.63 | 150.54 | 144.11           |

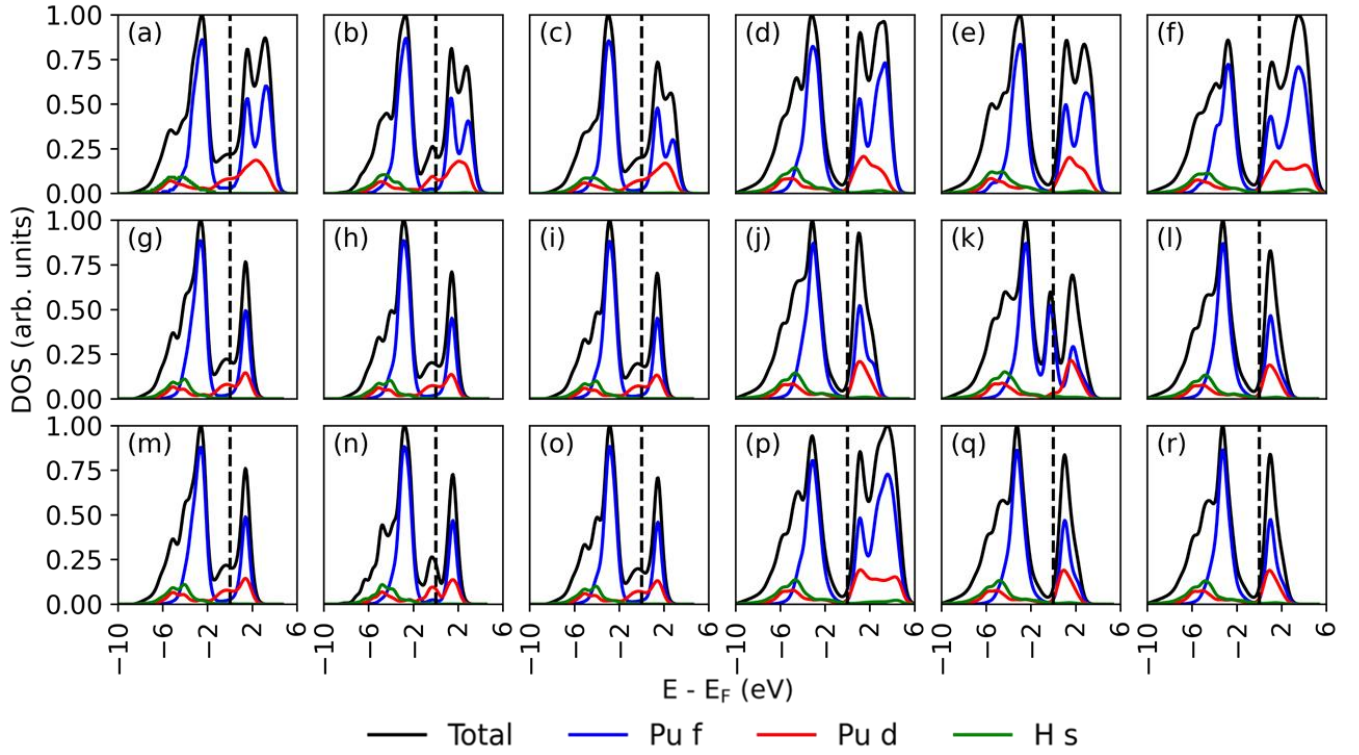

**Figure S2.** eDOS plots calculated using PBEsol+ $U$ +SOC ( $U = 4$  eV) for cubic  $\text{PuH}_2/\text{PuH}_3$  with: FM (a/d)  $\langle 100 \rangle$ , (b/e)  $\langle 110 \rangle$  and (c/f)  $\langle 111 \rangle$ ; longitudinal AFM (g/j) 1k, (h/k) 2k, and (i/l) 3k; and transverse AFM (m/p) 1k, (n/q) 2k, and (o/r) 3k. The Fermi level is at 0 eV denoted by a vertical dashed line.

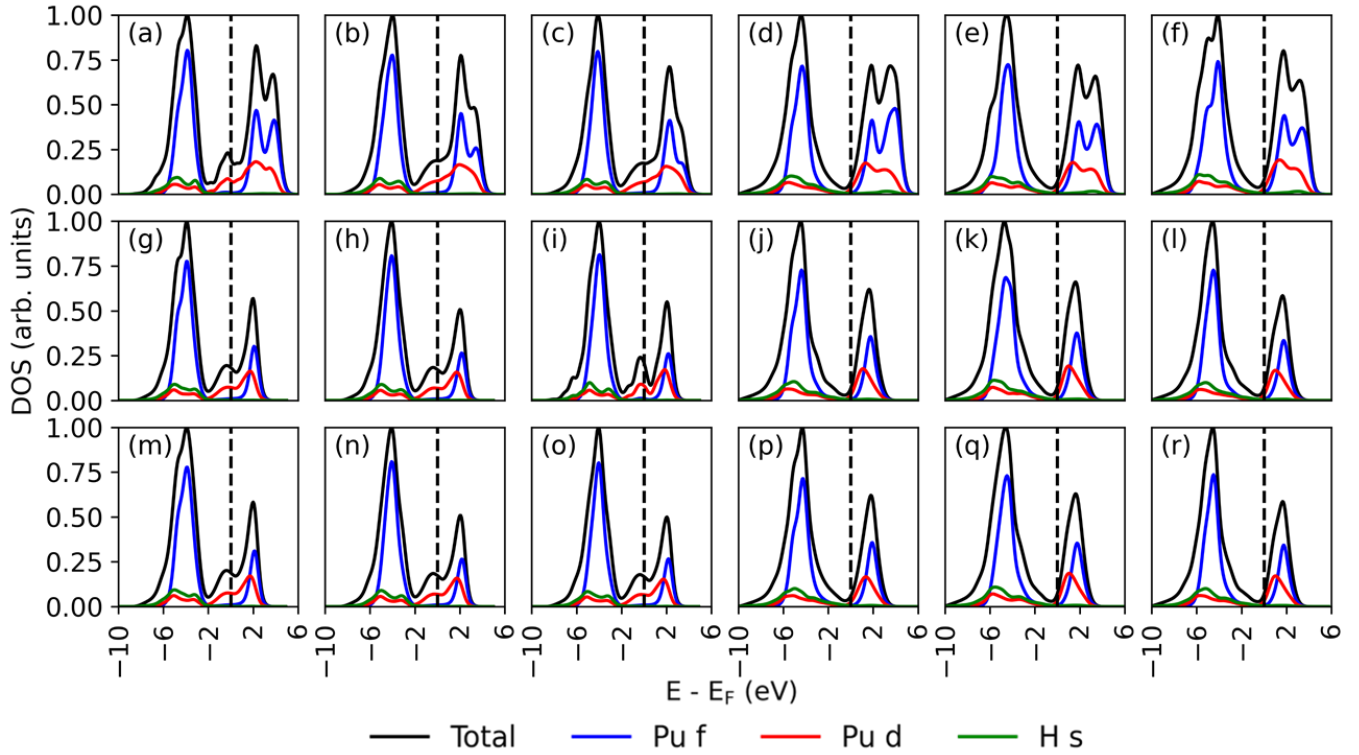

**Figure S3.** eDOS plots calculated using PBEsol+ $U$ +SOC ( $U = 6$  eV) for cubic  $\text{PuH}_2/\text{PuH}_3$  with: FM (a/d)  $\langle 100 \rangle$ , (b/e)  $\langle 110 \rangle$  and (c/f)  $\langle 111 \rangle$ ; longitudinal AFM (g/j) 1k, (h/k) 2k, and (i/l) 3k; and transverse AFM (m/p) 1k, (n/q) 2k, and (o/r) 3k. The Fermi level is at 0 eV denoted by a vertical dashed line.

## References

- 1 S. Grimme, J. Antony, S. Ehrlich and H. Krieg, A consistent and accurate ab initio parametrization of density functional dispersion correction (DFT-D) for the 94 elements H-Pu. *J. Chem. Phys.*, **2010**, *132*, 154104.
- 2 R. N. R. Mulford and G. E. Sturdy, The Plutonium-Hydrogen System. I. Plutonium Dihydride and Dideuteride. *J. Am. Chem. Soc.*, **1955**, *77*, 3449.
- 3 T. Muromura, T. Yahata, K. Ouchi and M. Iseki, The variation of lattice parameter with hydrogen content of non-stoichiometric plutonium dihydride. *J. Inorg. Nucl. Chem.*, **1972**, *34*, 171.
